# Supplementary material
Source: PubMed Central journal article supplement (PMC4347351)
Supplement: SD9.pdf [file SD9.pdf]

SUPPLEMENTAL TABLE 1  
Genbank accession numbers used for phylogenetic analyses

| Virus                                | Strain                   | Accession no. |
|--------------------------------------|--------------------------|---------------|
| Kamiti River virus (KRV)             | SR-75                    | AY149904      |
| Kamiti River virus (KRV)             | SR-82                    | AY149905      |
| Cell fusing agent virus (CFAV)       | n/a                      | NC_001564     |
| <i>Aedes flavivirus</i> (AeFV)       | Narita-21                | AB488408      |
| <i>Aedes flavivirus</i> (AeFV)       | AEFV-SPFLD-MO-2011-MP6   | KC181923      |
| Nakiwogo (NAKV)                      | Uganda08                 | GQ165809      |
| Quang Binh (QBV)                     | VN180                    | NC_012671     |
| <i>Culex flavivirus</i> (CxFV)       | HOU24518                 | FJ502995      |
| <i>Culex flavivirus</i> (CxFV)       | UGANDA08                 | GQ165808      |
| <i>Culex flavivirus</i> (CxFV)       | CxFV-Mex07               | EU879060      |
| <i>Culex flavivirus</i> (CxFV)       | Iowa07                   | FJ663034      |
| <i>Culex flavivirus</i> (CxFV)       | SDDM06-11                | JQ518484      |
| <i>Culex flavivirus</i> (CxFV)       | H0901                    | HQ678513      |
| <i>Culex flavivirus</i> (CxFV)       | HLD105                   | JQ308187      |
| <i>Culex flavivirus</i> (CxFV)       | DG1007                   | JQ308190      |
| <i>Culex flavivirus</i> (CxFV)       | DG1068                   | JQ308189      |
| <i>Culex flavivirus</i> (CxFV)       | Toyama2627               | AB701776      |
| <i>Culex flavivirus</i> (CxFV)       | NIID-21-2                | AB377213      |
| <i>Culex flavivirus</i> (CxFV)       | Tokyo                    | AB262759      |
| <i>Culex flavivirus</i> (CxFV)       | Toyama1849               | AB701769      |
| <i>Culex flavivirus</i> (CxFV)       | Toyama861                | AB701774      |
| <i>Culex flavivirus</i> (CxFV)       | Toyama1431               | AB701775      |
| Modoc virus (MODV)                   | M544                     | AJ242984      |
| Apoi virus (APOIV)                   | n/a                      | NC_003676     |
| Rio Bravo virus (RBV)                | RiMAR                    | AF144692      |
| Tyuleniy virus (TYUV)                | n/a                      | DQ235148      |
| Meaban virus (MEAV)                  | France                   | DQ235144      |
| Saumarez Reef virus (SREV)           | Australia                | DQ235150      |
| Kadam virus (KADV)                   | Uganda                   | DQ235146      |
| Gadget's Gully virus (GGYV)          | CSIRO122                 | DQ235145      |
| Greek goat encephalitis virus (GGEV) | Vergina                  | DQ235153      |
| Royal Farm virus (RFV)               | Afghanistan              | DQ235149      |
| Karshi virus (KSIV)                  | n/a                      | NC_006947     |
| Powassan virus (POWV)                | DTVWiA08                 | HM440560      |
| Kyasanur forest disease virus (KFDV) | It P9605                 | AY323490      |
| Alkharma virus (AHFV)                | n/a                      | NC_004355     |
| Langat virus (LGTV)                  | TP21                     | AF253419      |
| Omsk hemorrhagic fever virus (OHFV)  | Bogoluvovska             | NC_005062     |
| Tick-borne encephalitis virus (TBEV) | Neudoerfl                | U27495        |
| Tick-borne encephalitis virus (TBEV) | Sofjin-HO                | AB062064      |
| Yokose virus (YOKV)                  | Oita 36                  | AB114858      |
| Entebbe bat virus (ENTV)             | UgIL-30                  | DQ837641      |
| Sepik virus (SEPV)                   | n/a                      | NC_008719     |
| Yellow fever virus (YFV)             | TVP11767                 | HM582851      |
| Yellow fever virus (YFV)             | ASIBI                    | AY640589      |
| Edge Hill virus (EHV)                | YMP 48                   | DQ859060      |
| Bouboui virus (BOUV)                 | DAK AR B490              | DQ859057      |
| Potiskum virus (POTV)                | IBAN 10069               | DQ859067      |
| Uganda S virus (UGSV)                | n/a                      | DQ859065      |
| Nanay virus (NANV)                   | PRD316/PER/09            | JX627335      |
| Nounane virus (NOUV)                 | n/a                      | EU159426      |
| Donggang virus (DGV)                 | DG0909                   | JQ086551      |
| Lammi virus (LAMV)                   | n/a                      | FJ606789      |
| Chaoyang virus (CHAOV)               | Deming                   | FJ883471      |
| Chaoyang virus (CHAOV)               | ROK144                   | JQ068102      |
| Chaoyang virus (CHAOV)               | HLD115                   | JQ308185      |
| Dengue 4 (DENV4)                     | DENV-4/US/BID-V2448/1999 | FJ882601      |
| Dengue 1 (DENV1)                     | DENV-1/NI/BID-V534/2005  | JN819402      |
| Dengue 2 (DENV2)                     | DENV-2/NI/BID-V2599/2006 | HQ733861      |
| Dengue 3 (DENV3)                     | DENV-3/NI/BID-V5467/2010 | JF920405      |
| Zika virus (ZIKV)                    | n/a                      | EU545988      |
| Spondweni virus (SPOV)               | SM-6 V-1                 | DQ859064      |
| Kokobera virus (KOKV)                | AusMRM 32                | AY632541      |
| Iguape virus (IGUV)                  | SPAn 71686               | AY632538      |
| St. Louis encephalitis virus (SLEV)  | Kern217                  | DQ525916      |
| St. Louis encephalitis virus (SLEV)  | 79V-2533                 | FJ753287      |
| Bagaza virus (BAGV)                  | DakAr B209               | AY632545      |
| Rocio virus (ROCV)                   | SPH 34675                | AY632542      |
| Ilheus virus (ILHV)                  | Original                 | AY632539      |
| Kunjil virus (KUNV)                  | pAKUN                    | AY274505      |

(continued)

SUPPLEMENTAL TABLE 1  
Continued

| Virus                                   | Strain                  | Accession no. |
|-----------------------------------------|-------------------------|---------------|
| West Nile virus (WNV)                   | WNV-1/US/BID-V4343/2002 | HQ671742      |
| West Nile virus (WNV)                   | WNV-1/US/BID-V5218/2008 | JF920747      |
| Japanese encephalitis virus (JEV)       | JEV/eq/Tottori/2003     | AB594829      |
| Usutu virus (USUV)                      | n/a                     | NC_006551     |
| Murray Valley encephalitis virus (MVEV) | MVE-1-51                | AF161266      |
| Alfuy virus (ALFV)                      | MRM3929                 | AY898809      |
